# Supplementary material for: Sustainable Rainwater Management and Life Cycle Assessment: Challenges and Perspectives
Source: MDPI journal article supplement (doi:10.3390/su151612133), 2023-08-08
Supplement: s1 [file s1]

## Sustainable Rainwater Management and Life Cycle Assessment: Challenges and Perspectives

Igor Catão Martins Vaz, Rodrigo Novais Istchuk, Tânia Mara Sebben Oneda and Enedir Ghisi

### Supplementary data - Sustainable Rainwater Management and LCA: Challenges and Perspectives

**Table S1. Selected articles (continues).**

| Count | Title                                                                                                                                       | Authors                                                                               | Year | DOI                             |
|-------|---------------------------------------------------------------------------------------------------------------------------------------------|---------------------------------------------------------------------------------------|------|---------------------------------|
| 1     | Techno-economic and sensitivity analysis of rainwater harvesting system as alternative water source                                         | Abas P.E., Mahlia T.M.I.                                                              | 2019 | 10.3390/su11082365              |
| 2     | Economic and environmental analysis of standard, high efficiency, rainwater flushed, and composting toilets                                 | Anand C., Apul D.S.                                                                   | 2011 | 10.1016/j.jenvman.2010.08.005   |
| 3     | Environmental analysis of rainwater harvesting infrastructures in diffuse and compact urban models of Mediterranean climate                 | Angrill S., Farreny R., Gasol C.M., Gabarrell X., Viñolas B., Josa A., Rieradevall J. | 2012 | 10.1007/s11367-011-0330-6       |
| 4     | Environmental performance of rainwater harvesting strategies in Mediterranean buildings                                                     | Angrill S., Segura-Castillo L., Petit-Boix A., Rieradevall J., Gabarrell X., Josa A.  | 2017 | 10.1007/s11367-016-1174-x       |
| 5     | Environmental assessment of a permeable pavement system used to harvest stormwater for non-potable water uses in a building                 | Antunes L.N., Ghisi E., Severis R.M.                                                  | 2020 | 10.1016/j.scitotenv.2020.141087 |
| 6     | Reduction of environmental impacts due to using permeable pavements to harvest stormwater                                                   | Antunes L.N., Sydney C., Ghisi E., Phoenix V.R., Thives L.P., White C., Garcia E.S.H. | 2020 | 10.3390/w12102840               |
| 7     | Onsite Non-potable Reuse for Large Buildings: Environmental and Economic Suitability as a Function of Building Characteristics and Location | Arden S., Morelli B., Cashman S., Ma X.C., Jahne M., Garland J.                       | 2021 | 10.1016/j.watres.2020.116635    |
| 8     | Reducing life-cycle carbon footprint in the (re)design of water distribution systems using water demand management interventions            | Basupi I., Kapelan Z., Butler D.                                                      | 2014 | 10.1080/1573062X.2012.750374    |

**Table S1. Selected articles (continues).**

| Count | Title                                                                                                                                            | Authors                                                                                        | Year | DOI                             |
|-------|--------------------------------------------------------------------------------------------------------------------------------------------------|------------------------------------------------------------------------------------------------|------|---------------------------------|
| 9     | Environmental impact analysis of a water supply system: Study of an Indian university campus                                                     | Bhakar V., Sihag N.,<br>Gieschen R., Andrew S.,<br>Herrmann C., Sangwan<br>K.S.                | 2015 | 10.1016/j.procir.2015.02.061    |
| 10    | Development of LCA Calculator to support community infrastructure co-design                                                                      | Borrion A., Matsushita J.,<br>Austen K., Johnson C., Bell<br>S.                                | 2019 | 10.1007/s11367-018-1492-2       |
| 11    | Life cycle assessment of point source emissions and infrastructure impacts of four types of urban stormwater systems                             | Brudler S.; Arnbjerg-<br>Nielsen K.; Hauschild<br>M.Z.; Ammitsøe C.;<br>Hénonin J.; Rygaard M. | 2019 | 10.1016/j.watres.2019.03.044    |
| 12    | Life cycle assessment of stormwater management in the context of climate change adaptation                                                       | Brudler S.; Arnbjerg-<br>Nielsen K.; Hauschild<br>M.Z.; Rygaard M.                             | 2016 | 10.1016/j.watres.2016.10.024    |
| 13    | Water-supply options in arsenic-affected regions in Cambodia: Targeting the bottom income quintiles                                              | Chamberlain J.F., Sabatini<br>D.A.                                                             | 2014 | 10.1016/j.scitotenv.2013.12.011 |
| 14    | Economic and Energy Efficiency of Net-Zero Water Communities: System Dynamics Analysis                                                           | Chhipi-Shrestha G.,<br>Hewage K., Sadiq R.                                                     | 2018 | 10.1061/JSWBAY.0000854          |
| 15    | Development and application of EEAST: A life cycle based model for use of harvested rainwater and composting toilets in buildings                | Devkota J., Schlachter H.,<br>Anand C., Phillips R., Apul<br>D.                                | 2013 | 10.1016/j.jenvman.2013.09.015   |
| 16    | Life cycle based evaluation of harvested rainwater use in toilets and for irrigation                                                             | Devkota J., Schlachter H.,<br>Apul D.                                                          | 2015 | 10.1016/j.jclepro.2015.02.021   |
| 17    | Introducing demand to supply ratio as a new metric for understanding life cycle greenhouse gas (GHG) emissions from rainwater harvesting systems | Devkota J.P., Burian S.J.,<br>Tavakol-Davani H., Apul<br>D.S.                                  | 2017 | 10.1016/j.jclepro.2015.10.073   |
| 18    | Stormwater management for highly urbanized areas in the tropics: Life cycle assessment of low impact development practices                       | dos Santos M.F.N.;<br>Barbassa A.P.; Vasconcelos<br>A.F.; Ometto A.R.                          | 2021 | 10.1016/j.jhydrol.2021.126409   |
| 19    | An eco-efficiency evaluation of community-scale rainwater and stormwater harvesting in Aarhus, Denmark                                           | Faragò M., Brudler S.,<br>Godskesen B., Rygaard M.                                             | 2019 | 10.1016/j.jclepro.2019.01.265   |

**Table S1. Selected articles (continues).**

| Count | Title                                                                                                                                                 | Authors                                                                               | Year | DOI                             |
|-------|-------------------------------------------------------------------------------------------------------------------------------------------------------|---------------------------------------------------------------------------------------|------|---------------------------------|
| 20    | Cost-efficiency of rainwater harvesting strategies in dense Mediterranean neighbourhoods                                                              | Farreny R., Gabarrell X., Rieradevall J.                                              | 2011 | 10.1016/j.resconrec.2011.01.008 |
| 21    | Economic and environmental analysis of five Chinese rural toilet technologies based on the economic input–output life cycle assessment                | Gao H., Zhou C., Li F., Han B., Li X.                                                 | 2017 | 10.1016/j.jclepro.2015.12.089   |
| 22    | Environmental and economic analysis for the optimal reuse of water in a residential complex                                                           | García-Montoya M., Sengupta D., Nápoles-Rivera F., Ponce-Ortega J.M., El-Halwagi M.M. | 2016 | 10.1016/j.jclepro.2015.06.109   |
| 23    | Holistic impact assessment and cost savings of rainwater harvesting at the watershed scale                                                            | Ghimire S.R., Johnston J.M.                                                           | 2017 | 10.1525/elementa.135            |
| 24    | A modified eco-efficiency framework and methodology for advancing the state of practice of sustainability analysis as applied to green infrastructure | Ghimire S.R., Johnston J.M.                                                           | 2017 | 10.1002/ieam.1928               |
| 25    | Life cycle assessment of a rainwater harvesting system compared with an AC condensate harvesting system                                               | Ghimire S.R., Johnston J.M., Garland J., Edelen A., Ma X.C., Jahne M.                 | 2019 | 10.1016/j.resconrec.2019.01.043 |
| 26    | Life cycle assessment of domestic and agricultural rainwater harvesting systems                                                                       | Ghimire S.R., Johnston J.M., Ingwersen W.W., Hawkins T.R.                             | 2014 | 10.1021/es500189f               |
| 27    | Life cycle assessment of a commercial rainwater harvesting system compared with a municipal water supply system                                       | Ghimire S.R., Johnston J.M., Ingwersen W.W., Sojka S.                                 | 2017 | 10.1016/j.jclepro.2017.02.025   |
| 28    | ASTA — A method for multi-criteria evaluation of water supply technologies to Assess the most Sustainable Alternative for Copenhagen                  | Godskesen B., Hauschild M., Albrechtsen H.-J., Rygaard M.                             | 2018 | 10.1016/j.scitotenv.2017.11.018 |
| 29    | Life-cycle and freshwater withdrawal impact assessment of water supply technologies                                                                   | Godskesen B., Hauschild M., Rygaard M., Zambrano K., Albrechtsen H.-J.                | 2013 | 10.1016/j.watres.2013.02.005    |
| 30    | Environmental performance of a hybrid rainwater harvesting and greywater reuse system: A case study on a high water consumption household in Colombia | Gómez-Monsalve M., Domínguez I.C., Yan X., Ward S., Oviedo-Ocaña E.R.                 | 2022 | 10.1016/j.jclepro.2022.131125   |

**Table S1. Selected articles (continues).**

| Count | Title                                                                                                                                                | Authors                                                                                                   | Year | DOI                                |
|-------|------------------------------------------------------------------------------------------------------------------------------------------------------|-----------------------------------------------------------------------------------------------------------|------|------------------------------------|
| 31    | Rainwater utilization from roof catchments in arid regions: A case study for Australia                                                               | Hajani E., Rahman A.                                                                                      | 2014 | 10.1016/j.jaridenv.2014.07.007     |
| 32    | Lifecycle assessment analysis of engineered stormwater control methods common to urban watersheds                                                    | Hengen T.J.; Sieverding H.L.; Stone J.J.                                                                  | 2016 | 10.1061/(ASCE)WR.1943-5452.0000647 |
| 33    | Rainwater harvesting for drinking water production: A sustainable and cost-effective solution in The Netherlands?                                    | Hofman-Caris R., Bertelkamp C., de Waal L., van den Brand T., Hofman J., van der Aa R., van der Hoek J.P. | 2019 | 10.3390/w11030511                  |
| 34    | Life cycle assessment of low impact development technologies combined with conventional centralized water systems for the City of Atlanta, Georgia   | Jeong H., Broesicke O.A., Drew B., Li D., Crittenden J.C.                                                 | 2016 | 10.1007/s11783-016-0851-0          |
| 35    | The role of climate change and decentralization in urban water services: A dynamic energy-water nexus analysis                                       | Khalkhali M., Dilkina B., Mo W.                                                                           | 2021 | 10.1016/j.watres.2021.117830       |
| 36    | Life-cycle assessment and life-cycle cost analysis of decentralised rainwater harvesting, greywater recycling and hybrid rainwater-greywater systems | Leong J.Y.C., Balan P., Chong M.N., Poh P.E.                                                              | 2019 | 10.1016/j.jclepro.2019.05.046      |
| 37    | Multi-objective optimization integrated with life cycle assessment for rainwater harvesting systems                                                  | Li Y., Huang Y., Ye Q., Zhang W., Meng F., Zhang S.                                                       | 2018 | 10.1016/j.jhydrol.2018.02.007      |
| 38    | Alternative water supply solutions: China's South-to-North-water-diversion in Jinan                                                                  | Liu Y., Wang M., Webber M., Zhou C., Zhang W.                                                             | 2020 | 10.1016/j.jenvman.2020.111337      |
| 39    | Assessment of the environmental impact and investment feasibility analysis of rainwater use in houses                                                | Marinoski A.K., Ghisi E.                                                                                  | 2011 | 10.2495/RAV110361                  |
| 40    | Environmental performance of hybrid rainwater-greywater systems in residential buildings                                                             | Marinoski A.K., Ghisi E.                                                                                  | 2019 | 10.1016/j.resconrec.2019.01.035    |
| 41    | Environmental benefit analysis of strategies for potable water savings in residential buildings                                                      | Marinoski A.K., Rupp R.F., Ghisi E.                                                                       | 2018 | 10.1016/j.jenvman.2017.10.004      |
| 42    | Life cycle energy assessment and economic feasibility of stormwater harvested from pervious pavements                                                | Martins Vaz I.C., Ghisi E., Thives L.P.                                                                   | 2020 | 10.1016/j.watres.2019.115322       |
| 43    | Financial and environmental modelling of water hardness - Implications for utilising harvested rainwater in washing machines                         | Morales-Pinzón T., Lurueña R., Gabarrell X., Gasol C.M., Rieradevall J.                                   | 2014 | 10.1016/j.scitotenv.2013.10.101    |

**Table S1. Selected articles (continues).**

| Count | Title                                                                                                                                                       | Authors                                                                                                            | Year | DOI                                       |
|-------|-------------------------------------------------------------------------------------------------------------------------------------------------------------|--------------------------------------------------------------------------------------------------------------------|------|-------------------------------------------|
| 44    | Modelling for economic cost and environmental analysis of rainwater harvesting systems                                                                      | Morales-Pinzón T.,<br>Rieradevall J., Gasol C.M.,<br>Gabarrell X.                                                  | 2015 | 10.1016/j.jclepro.2014.10.021             |
| 45    | A Financial, Environmental and Social Evaluation of Domestic Water Management Options in the West Bank, Palestine                                           | Nazer D.W., Siebel M.A.,<br>van der Zaag P., Mimi Z.,<br>Gijzen H.J.                                               | 2010 | 10.1007/s11269-010-9667-z                 |
| 46    | A Scenario-Driven Assessment of the Economic Feasibility of Rainwater Harvesting Using Optimized Storage                                                    | Nnaji C.C., Aigbavboa C.                                                                                           | 2020 | 10.1007/s11269-019-02462-x                |
| 47    | The design of net-zero-energy affordable housing in Philadelphia                                                                                            | Ozcan-Deniz G., Fryer R.,<br>Ferreira A.C.A.                                                                       | 2018 | 10.3390/designs2030026                    |
| 48    | Economic and environmental assessment of two different rain water harvesting systems for agriculture                                                        | Pari L., Suardi A.,<br>Stefanoni W., Latterini F.,<br>Palmieri N.                                                  | 2021 | 10.3390/su13073871                        |
| 49    | Life cycle and hydrologic modeling of rainwater harvesting in urban neighborhoods: Implications of urban form and water demand patterns in the US and Spain | Petit-Boix A., Devkota J.,<br>Phillips R., Vargas-Parra<br>M.V., Josa A., Gabarrell X.,<br>Rieradevall J., Apul D. | 2018 | 10.1016/j.scitotenv.2017.11.206           |
| 50    | Life-cycle perspective on residential water conservation strategies                                                                                         | Racoviceanu A.I., Karney<br>B.W.                                                                                   | 2010 | 10.1061/(ASCE)1076-<br>0342(2010)16:1(40) |
| 51    | Rainwater harvesting in Greater Sydney: Water savings, reliability and economic benefits                                                                    | Rahman A., Keane J.,<br>Imteaz M.A.                                                                                | 2012 | 10.1016/j.resconrec.2011.12.002           |
| 52    | Rainwater harvesting impacts on environment                                                                                                                 | Rashid A.R.M., Bhuiyan<br>M.A., Jayasuriya N.                                                                      | 2016 | -                                         |
| 53    | Life cycle assessment of rainwater harvesting system components – To determine environmentally sustainable design                                           | Rashid A.R.M., Bhuiyan<br>M.A., Pramanik B.,<br>Jayasuriya N.                                                      | 2021 | 10.1016/j.jclepro.2021.129286             |
| 54    | A comparison of environmental impacts between rainwater harvesting and rain garden scenarios                                                                | Rashid A.R.M., Bhuiyan<br>M.A., Pramanik B.,<br>Jayasuriya N.                                                      | 2022 | 10.1016/j.psep.2021.12.047                |
| 55    | Feasibility of rainwater harvesting on Scott Laboratory                                                                                                     | Shah D., Patel P., Kudo P.,<br>Steinberg A., Herold W.                                                             | 2013 | 10.1109/GHTC.2013.6713712                 |

**Table S1. Selected articles (continues).**

| Count | Title                                                                                                                                                    | Authors                                                                                             | Year | DOI                                    |
|-------|----------------------------------------------------------------------------------------------------------------------------------------------------------|-----------------------------------------------------------------------------------------------------|------|----------------------------------------|
| 56    | Performance of water efficiency measures in commercial buildings                                                                                         | Sousa V., Silva C.M.,<br>Meireles I.                                                                | 2019 | 10.1016/j.resconrec.2019.01.013        |
| 57    | Analysis of profitability of rainwater harvesting, gray water recycling and drain water heat recovery systems                                            | Stec A., Kordana S.                                                                                 | 2015 | 10.1016/j.resconrec.2015.10.006        |
| 58    | Lifecycle Analysis of a Single-Family Residential Rainwater Harvesting System in a Subtropical, Metropolitan Environment                                 | Sweeney J.F., Pate M.B.                                                                             | 2017 | 10.1061/JSWBAY.0000832                 |
| 59    | Comparative life cycle assessment of three alternative techniques for increasing potable water supply in cities in the Global South                      | Tarpani R.R.Z., Lapolli<br>F.R., Lobo Recio M.Á.,<br>Gallego-Schmid A.                              | 2021 | 10.1016/j.jclepro.2021.125871          |
| 60    | Developing urban water infrastructure modeling approach to control flood damages and reduce life cycle impacts                                           | Tavakol-Davani H., Burian<br>S., Apul D., Devkota J.                                                | 2013 | 10.1061/9780784412947.291              |
| 61    | A Watershed Scale Life Cycle Assessment Framework for Stormwater Management                                                                              | Tavakol-Davani H., Burian<br>S.J., Apul D.                                                          | 2018 | 10.1061/9780784481417.030              |
| 62    | Combining hydrologic analysis and life cycle assessment approaches to evaluate sustainability of water infrastructure                                    | Tavakol-Davani H., Burian<br>S.J., Butler D., Sample D.,<br>Devkota J., Apul D.                     | 2018 | 10.1061/(ASCE)IR.1943-<br>4774.0001340 |
| 63    | Performance and Cost-Based Comparison of Green and Gray Infrastructure to Control Combined Sewer Overflows                                               | Tavakol-Davani H., Burian<br>S.J., Devkota J., Apul D.                                              | 2016 | 10.1061/JSWBAY.0000805                 |
| 64    | Combining hydrologic analysis and life cycle assessment approaches to evaluate sustainability of water infrastructure: Uncertainty analysis              | Tavakol-Davani H., Rahimi<br>R., Burian S.J., Pomeroy<br>C.A., McPherson B.J., Apul<br>D.           | 2019 | 10.3390/w11122592                      |
| 65    | The environmental impact of household's water use: A case study in Flanders assessing various water sources, production methods and consumption patterns | Thomassen G., Huysveld<br>S., Boone L., Vilain C.,<br>Geysen D., Huysman K.,<br>Cools B., Dewulf J. | 2021 | 10.1016/j.scitotenv.2021.145398        |
| 66    | The Water-Energy-Carbon Nexus: Optimising Rainwater Harvesting in Mexico City                                                                            | Valdez M.C., Adler I.,<br>Barrett M., Ochoa R., Pérez<br>A.                                         | 2016 | 10.1007/s40710-016-0138-2              |

**Table S1. Selected articles (continues).**

| Count | Title                                                                                                                                                   | Authors                                                                                          | Year | DOI                             |
|-------|---------------------------------------------------------------------------------------------------------------------------------------------------------|--------------------------------------------------------------------------------------------------|------|---------------------------------|
| 67    | Synergies of green building retrofit strategies for improving sustainability and resilience via a building-scale food-energy-water nexus                | Valencia A., Zhang W., Gu L., Chang N.-B., Wanielista M.P.                                       | 2022 | 10.1016/j.resconrec.2021.105939 |
| 68    | Rainwater harvesting systems reduce detergent use                                                                                                       | Vargas-Parra M.V., Rovira-Val M.R., Gabarrell X., Villalba G.                                    | 2019 | 10.1007/s11367-018-1535-8       |
| 69    | Applying exergy analysis to rainwater harvesting systems to assess resource efficiency                                                                  | Vargas-Parra M.V., Villalba G., Gabarrell X.                                                     | 2013 | 10.1016/j.resconrec.2012.12.008 |
| 70    | Environmental analysis of a domestic rainwater harvesting system: A case study in France                                                                | Vialle C., Busset G., Tanfin L., Montrejaud-Vignoles M., Huau M.-C., Sablayrolles C.             | 2015 | 10.1016/j.resconrec.2015.07.024 |
| 71    | Assessing cost-effectiveness of bioretention on stormwater in response to climate change and urbanization for future scenarios                          | Wang M.; Zhang D.; Adhityan A.; Ng W.J.; Dong J.; Tan S.K.                                       | 2016 | 10.1016/j.jhydrol.2016.10.019   |
| 72    | Economic and environmental assessment of office building rainwater harvesting systems in various U.S. Cities                                            | Wang R., Zimmerman J.B.                                                                          | 2015 | 10.1021/es5046887               |
| 73    | Cost-benefit analysis of low-impact development at hectare scale for urban stormwater source control in response to anticipated climatic change         | Wang Z.; Zhou S.; Wang M.; Zhang D.                                                              | 2020 | 10.1016/j.jenvman.2020.110483   |
| 74    | Rainwater harvesting: Environmentally beneficial for the UK?                                                                                            | Way C.M., Martinson D.B., Heslop S.E., Cooke R.S.                                                | 2010 | 10.2166/ws.2010.189             |
| 75    | Performance assessment and life cycle analysis of potable water production from harvested rainwater by a decentralized system                           | Yan X., Ward S., Butler D., Daly B.                                                              | 2018 | 10.1016/j.jclepro.2017.11.198   |
| 76    | Modeling for sustainability: Life cycle assessment application to evaluate environmental performance of water recycling solutions at the dwelling level | Zanni S., Cipolla S.S., Fusco E.D., Lenci A., Altobelli M., Currado A., Maglionico M., Bonoli A. | 2019 | 10.1016/j.spc.2018.09.002       |
